# Supplementary material for: Osteopontin Expression in the Brain Triggers Localized Inflammation and Cell Death When Immune Cells Are Activated by Pertussis Toxin
Source: Hindawi journal article supplement (doi:10.1155/2014/358218), 2014-01-01

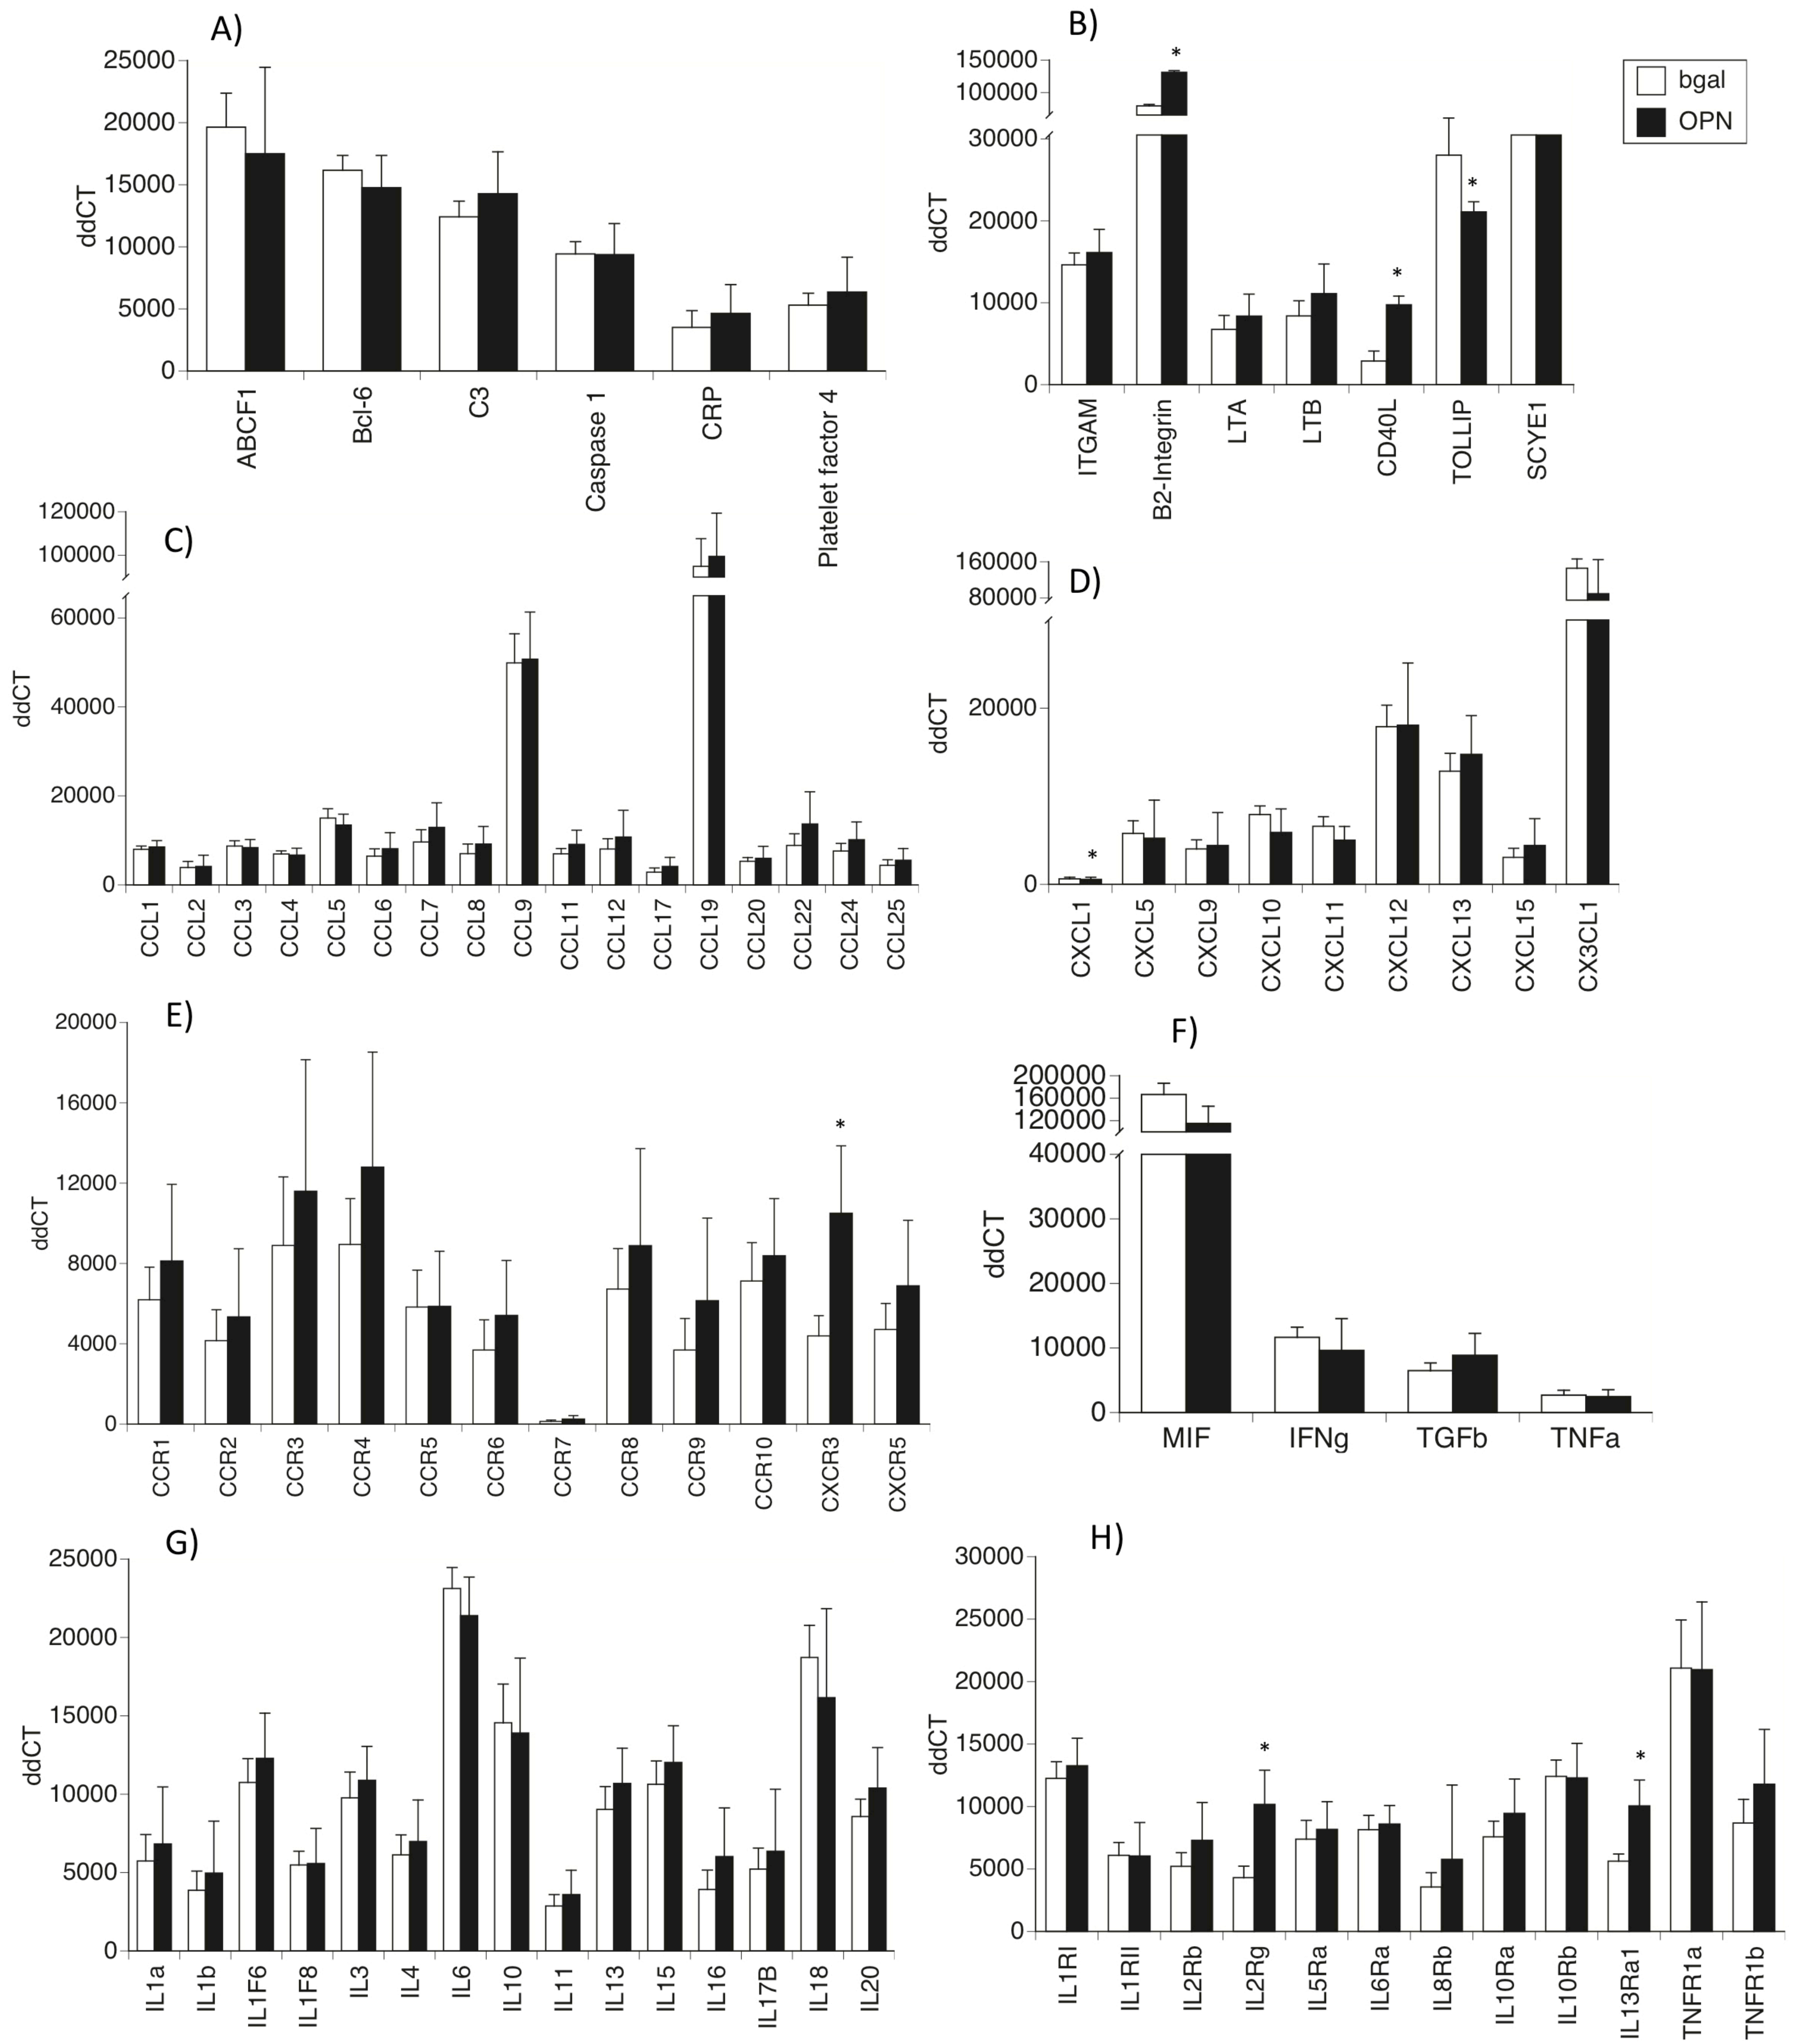

Supplement: f1 [file 358218.f1.pdf]
